# Supplementary material for: IDV Typer: An Automated Tool for Lineage Typing of Influenza D Viruses Based on Return Time Distribution
Source: MDPI journal article supplement (doi:10.3390/v16030373), 2024-02-28
Supplement: s1 [file s1]

**Table S1. Reference dataset.**

| <b>Sr. No</b> | <b>Accession ID</b> | <b>Lineage</b> | <b>Reference (Pubmed ID)</b> |
|---------------|---------------------|----------------|------------------------------|
| 1             | NC_036618           | D/OK           | 23408893                     |
| 2             | KM015501            | D/OK           | 35909676                     |
| 3             | KT592522            | D/OK           | 31801277                     |
| 4             | OM468246            | D/OK           | 35216016                     |
| 5             | MT511460            | D/OK           | 37491320                     |
| 6             | OM468247            | D/OK           | 35216016                     |
| 7             | OM468296            | D/OK           | 35216016                     |
| 8             | MK965261            | D/OK           | 35909676                     |
| 9             | MT511488            | D/OK           | 37491320                     |
| 10            | MN123883            | D/660          | 37491320                     |
| 11            | MW079473            | D/660          | 33771071                     |
| 12            | MW632181            | D/660          | 33771071                     |
| 13            | MW632188            | D/660          | 33771071                     |
| 14            | MT511412            | D/660          | 37491320                     |
| 15            | OM468233            | D/660          | 35216016                     |
| 16            | ON166840            | D/660          | 36533151                     |
| 17            | LC128433            | D/Yama2016     | 35909676                     |
| 18            | LC565476            | D/Yama2016     | 35909676                     |
| 19            | LC494108            | D/Yama2019     | 35909676                     |
| 20            | ON415266            | D/Yama2019     | 35909676                     |
| 21            | MW020308            | D/CA2019       | 33771071                     |
| 22            | MW020322            | D/CA2019       | 33771071                     |
| 23            | LN559126            | D/France2012   | 32611750                     |

**Table S2. True positive dataset**

| <b>Sr. No</b> | <b>Accession ID</b> | <b>Lineage</b> | <b>Reference (Pubmed ID)</b> |
|---------------|---------------------|----------------|------------------------------|
| 1             | KM015508            | D/OK           | 35909676                     |
| 2             | KM015494            | D/OK           | 35909676                     |
| 3             | KT581412            | D/OK           | 37491320                     |
| 4             | KT581418            | D/OK           | 37491320                     |
| 5             | KU171129            | D/OK           | 37491320                     |
| 6             | KX768827            | D/OK           | 31801277                     |
| 7             | KX768834            | D/OK           | 31801277                     |
| 8             | LC522354            | D/OK           | 32102883                     |
| 9             | MT636473            | D/OK           | 35909676                     |
| 10            | MW632174            | D/OK           | 33771071                     |
| 11            | MZ264979            | D/OK           | Not available                |
| 12            | MK131035            | D/OK           | 31801277                     |
| 13            | MN165188            | D/OK           | 31801277                     |
| 14            | MN165209            | D/OK           | 31801277                     |
| 15            | MN165257            | D/OK           | 31801277                     |
| 16            | MN123953            | D/OK           | 31801277                     |
| 17            | MT349627            | D/OK           | 36533151                     |
| 18            | MW079478            | D/OK           | 35909676                     |
| 19            | KT592526            | D/OK           | 31801277                     |

|    |          |      |          |
|----|----------|------|----------|
| 20 | MN123939 | D/OK | 31801277 |
| 21 | MN165216 | D/OK | 31801277 |
| 22 | OM468237 | D/OK | 35216016 |
| 23 | OM468238 | D/OK | 35216016 |
| 24 | OM468239 | D/OK | 35216016 |
| 25 | OM468240 | D/OK | 35216016 |
| 26 | OM468241 | D/OK | 35216016 |
| 27 | OM468242 | D/OK | 35216016 |
| 28 | OM468243 | D/OK | 35216016 |
| 29 | OM468244 | D/OK | 35216016 |
| 30 | OM468245 | D/OK | 35216016 |
| 31 | MN165202 | D/OK | 31801277 |
| 32 | MK101121 | D/OK | 35909676 |
| 33 | MN165195 | D/OK | 31801277 |
| 34 | KF425669 | D/OK | 35909676 |
| 35 | MG720235 | D/OK | 35909676 |
| 36 | MH315965 | D/OK | 35909676 |
| 37 | MH315966 | D/OK | 35909676 |
| 38 | MH315967 | D/OK | 35909676 |
| 39 | MH315968 | D/OK | 35909676 |
| 40 | MH315969 | D/OK | 35909676 |
| 41 | MH315970 | D/OK | 35909676 |
| 42 | MK965258 | D/OK | 31801277 |
| 43 | MK965262 | D/OK | 35909676 |
| 44 | MK965263 | D/OK | 35909676 |
| 45 | MK965264 | D/OK | 35909676 |
| 46 | MK965268 | D/OK | 35216016 |
| 47 | MK965269 | D/OK | 35216016 |
| 48 | MK965270 | D/OK | 35216016 |
| 49 | MK965271 | D/OK | 35909676 |
| 50 | MK965273 | D/OK | 35216016 |
| 51 | MK965278 | D/OK | 35909676 |
| 52 | MT511357 | D/OK | 37491320 |
| 53 | MT511364 | D/OK | 37491320 |
| 54 | MT511377 | D/OK | 37491320 |
| 55 | MT511384 | D/OK | 37491320 |
| 56 | MT511398 | D/OK | 37491320 |
| 57 | MT511405 | D/OK | 37491320 |
| 58 | MT511426 | D/OK | 37491320 |
| 59 | MT511433 | D/OK | 37491320 |
| 60 | MT511440 | D/OK | 37491320 |
| 61 | MT511453 | D/OK | 37491320 |
| 62 | MT511467 | D/OK | 37491320 |
| 63 | MT511474 | D/OK | 37491320 |
| 64 | MT511481 | D/OK | 37491320 |
| 65 | MT511495 | D/OK | 37491320 |
| 66 | MT511502 | D/OK | 37491320 |
| 67 | MT511515 | D/OK | 37491320 |
| 68 | MT511522 | D/OK | 37491320 |
| 69 | MT511536 | D/OK | 37491320 |
| 70 | MT511543 | D/OK | 37491320 |

|     |          |            |          |
|-----|----------|------------|----------|
| 71  | OM468248 | D/OK       | 35216016 |
| 72  | MK965259 | D/OK       | 31801277 |
| 73  | MK965265 | D/OK       | 35216016 |
| 74  | MK965266 | D/OK       | 35216016 |
| 75  | OK513025 | D/OK       | 35537488 |
| 76  | MT349564 | D/OK       | 36533151 |
| 77  | MK131026 | D/OK       | 37491320 |
| 78  | MN165223 | D/OK       | 31801277 |
| 79  | MK965277 | D/OK       | 37491320 |
| 80  | KM392492 | D/660      | 35909676 |
| 81  | KT581416 | D/660      | 37491320 |
| 82  | KT581417 | D/660      | 37491320 |
| 83  | KU171126 | D/660      | 35909676 |
| 84  | KU171127 | D/660      | 35909676 |
| 85  | KU171128 | D/660      | 35909676 |
| 86  | MN123959 | D/660      | 37491320 |
| 87  | MN123890 | D/660      | 37491320 |
| 88  | MN123925 | D/660      | 37491320 |
| 89  | MN123897 | D/660      | 37491320 |
| 90  | MN123946 | D/660      | 37491320 |
| 91  | MN123911 | D/660      | 37491320 |
| 92  | MT349516 | D/660      | 36533151 |
| 93  | MT349523 | D/660      | 36533151 |
| 94  | MT349530 | D/660      | 36533151 |
| 95  | MT349599 | D/660      | 36533151 |
| 96  | MT349606 | D/660      | 36533151 |
| 97  | MT349647 | D/660      | 36533151 |
| 98  | MT349654 | D/660      | 36533151 |
| 99  | MN123869 | D/660      | 37491320 |
| 100 | MW079472 | D/660      | 37491320 |
| 101 | MW079475 | D/660      | 37491320 |
| 102 | MW079476 | D/660      | 37491320 |
| 103 | MW079474 | D/660      | 37491320 |
| 104 | MW079477 | D/660      | 37491320 |
| 105 | OM468234 | D/660      | 35216016 |
| 106 | OM468235 | D/660      | 35216016 |
| 107 | OM468236 | D/660      | 35216016 |
| 108 | MT246289 | D/660      | 37491320 |
| 109 | MT246269 | D/660      | 37491320 |
| 110 | MK054184 | D/660      | 35909676 |
| 111 | MN173611 | D/660      | 31801277 |
| 112 | MT511336 | D/660      | 37491320 |
| 113 | MT511391 | D/660      | 37491320 |
| 114 | MT511419 | D/660      | 37491320 |
| 115 | MT511529 | D/660      | 37491320 |
| 116 | MT246282 | D/660      | 37491320 |
| 117 | MT246276 | D/660      | 37491320 |
| 118 | LC270268 | D/Yama2016 | 35909676 |
| 119 | LC318668 | D/Yama2016 | 35909676 |
| 120 | LC565477 | D/Yama2019 | 35909676 |
| 121 | MW020315 | D/CA2019   | 33771071 |

|     |          |            |          |
|-----|----------|------------|----------|
| 122 | ON038774 | D/OK       | 36533151 |
| 123 | ON038776 | D/OK       | 36533151 |
| 124 | ON038778 | D/OK       | 36533151 |
| 125 | ON038779 | D/OK       | 36533151 |
| 126 | ON038782 | D/OK       | 36533151 |
| 127 | ON038794 | D/OK       | 36533151 |
| 128 | ON038934 | D/OK       | 36533151 |
| 129 | ON038935 | D/OK       | 36533151 |
| 130 | OP353622 | D/OK       | 36103901 |
| 131 | KT592533 | D/OK       | 37491320 |
| 132 | ON166834 | D/660      | 36533151 |
| 133 | ON166835 | D/660      | 36533151 |
| 134 | ON166836 | D/660      | 36533151 |
| 135 | ON166837 | D/660      | 36533151 |
| 136 | ON166838 | D/660      | 36533151 |
| 137 | ON166839 | D/660      | 36533151 |
| 138 | ON166842 | D/660      | 36533151 |
| 139 | ON166843 | D/660      | 36533151 |
| 140 | OP474074 | D/660      | 37347825 |
| 141 | OP020136 | D/Yama2016 | 37491320 |
| 142 | OP020135 | D/Yama2019 | 37491320 |
| 143 | OP353623 | D/Yama2019 | 36103901 |

**Table S3. True Negative dataset**

| <b>Sr. No</b> | <b>Accession ID</b> | <b>Gene</b> | <b>Virus Name</b> |
|---------------|---------------------|-------------|-------------------|
| 1             | KP417469            | PA          | Influenza A Virus |
| 2             | MW220337            | PA          | Influenza A Virus |
| 3             | OR762342            | PA          | Influenza A Virus |
| 4             | KM654714            | PB1         | Influenza A Virus |
| 5             | KP286559            | PB1         | Influenza A Virus |
| 6             | EF124030            | PB1         | Influenza A Virus |
| 7             | FJ805464            | PB2         | Influenza A Virus |
| 8             | DQ992569            | PB2         | Influenza A Virus |
| 9             | MZ717369            | PB2         | Influenza A Virus |
| 10            | MW547645            | NP          | Influenza A Virus |
| 11            | KX351451            | PB1         | Influenza B Virus |
| 12            | MZ951444            | PB1         | Influenza B Virus |
| 13            | MK961711            | PB2         | Influenza B Virus |
| 14            | KM654702            | PB2         | Influenza B Virus |
| 15            | KM654724            | PB2         | Influenza B Virus |
| 16            | CY182406            | PA          | Influenza B Virus |
| 17            | MH684318            | PA          | Influenza B Virus |
| 18            | KM654766            | PA          | Influenza B Virus |
| 19            | JQ396208            | HA          | Influenza B Virus |
| 20            | KX615582            | HA          | Influenza B Virus |
| 21            | MH726977            | HA          | Influenza B Virus |
| 22            | MF195765            | HA          | Influenza B Virus |
| 23            | MH684330            | NP          | Influenza B Virus |
| 24            | KX615311            | NP          | Influenza B Virus |

|    |          |     |                   |
|----|----------|-----|-------------------|
| 25 | OQ997395 | NP  | Influenza B Virus |
| 26 | JX513007 | NP  | Influenza B Virus |
| 27 | MH348116 | HE  | Influenza C Virus |
| 28 | GQ853452 | HE  | Influenza C Virus |
| 29 | LC122648 | HE  | Influenza C Virus |
| 30 | KT232085 | HE  | Influenza C Virus |
| 31 | KM504281 | NP  | Influenza C Virus |
| 32 | FR671423 | NP  | Influenza C Virus |
| 33 | ON038921 | PB2 | Influenza D Virus |
| 34 | MT349586 | PB2 | Influenza D Virus |
| 35 | MK965340 | P3  | Influenza D Virus |
| 36 | KX424578 | NP  | Isavirus          |
| 37 | KX823915 | NP  | Isavirus          |
| 38 | GU830905 | NP  | Isavirus          |
| 39 | AF287950 | PB1 | Isavirus          |
| 40 | KU587559 | PA  | Isavirus          |
| 41 | KU587567 | PA  | Isavirus          |
| 42 | KU587575 | PA  | Isavirus          |
| 43 | MN053829 | PB2 | Quarantavirus     |
| 44 | MZ502308 | PB2 | Quarantavirus     |
| 45 | MW256693 | NP  | Quarantavirus     |
| 46 | ON160025 | NP  | Quarantavirus     |
| 47 | MW256684 | HA  | Quarantavirus     |
| 48 | MH688515 | PA  | Thogotovirus      |
| 49 | MT628436 | PA  | Thogotovirus      |
| 50 | AF006073 | PA  | Thogotovirus      |
